# Supplementary material
Source: PubMed Central journal article supplement (PMC4220763)
Supplement: CJN.03850414_CJN03850414SupplementaryData.pdf [file CJN.03850414_CJN03850414SupplementaryData.pdf]

**Aedtner F**, AMEOS Poliklinikum Halberstadt, Halberstadt / **Arndt L**, Nieren- und Hochdruckzentren Süderelbe - Praxis und Dialyse Buchholz, Buchholz / **Arnold P**, PHV-Dialysezentrum Siegen, Siegen / **Assenmacher A**, Dialysezentrum Kamp-Lintfort, Kamp-Lintfort / **Bajeski V**, Bielefelder Dialysezentrum, Bielefeld / **Beckermann J**, Nephrologisches Zentrum Vechta, Vechta / **Beckmann M L**, Dialysezentrum Bocholt, Bocholt / **Benzing T**, Uniklinik Köln, Köln / **Bieringer M**, Helios Klinikum Berlin-Buch, Berlin / **Biolik K**, KfH Nierenzentrum Berlin Köpenik, Berlin / **Bozkurt F**, Dialysezentrum Daun, Daun / **Bramstedt J**, Klinikum Bremerhaven Reinkenheide, Bremerhaven / **Braun J R**, Praxen Dr. Braun, Dingolfing / **Busch M**, Universitätsklinikum Jena, Jena / **Büsse maker E**, Dialysezentrum Hamm, Hamm / **Clasen W**, Herz-Jesu-Krankenhaus Münster-Hiltrup, Münster / **Dannemann E G**, Medizinisches Versorgungszentrum Gelsenkirchen-Buer, Gelsenkirchen / **Daul A**, Elisabeth-Krankenhaus, Essen / **Dellanna F**, MVZ DaVita Karlstraße, Düsseldorf / **Dorsch O**, KfH Nierenzentrum Kronach, Kronach / **Floege J**, Universitätsklinikum der RWTH Aachen, Aachen / **Fricke L**, Universitätsklinikum Schleswig-Holstein, Lübeck / **Friedrich B**, PHV-Dialysezentrum Leonberg, Leonberg / **Galle J**, Klinikum Lüdenscheid, Lüdenscheid / **Gerhardt T**, Praxis für Nieren- und Hochdruckkrankheiten und Dialysezentrum Bonn - Bad Godesberg, Bonn / **Gerke P**, Nierenzentrum am Sana Klinikum, Lübeck / **Gerth J**, Heinrich-Braun-Klinikum Zwickau, Zwickau / **Goldmann A**, Nephrologische Praxis Neunkirchen, Neunkirchen / **Grosser S**, MVZ Dialyse Alter Teichweg, Hamburg / **Haberstroh U**, PHV-Dialysezentrum Limburg, Limburg / **Hamadeh A**, Dialysezentrum Höxter, Höxter / **Heckel M**, KfH Nierenzentrum Kronach, Kronach / **Hermle T**, Universitätsklinikum Freiburg, Freiburg i.Br. / **Hohenstein B**, Universitätsklinikum Carl Gustav Carus Dresden, Dresden / **Holl W**, Nierenzentrum Solingen, Solingen / **Hollenbeck M**, Knappschaftskrankenhaus Bottrop, Bottrop / **Jabs W**, Vivantes Klinikum im Friedrichshain, Berlin / **Jacobsen J**, Nieren- und Hochdruckzentrum Süderelbe – Praxis und Dialyse Winsen, Hamburg / **Jung O**, Universitätsklinikum der Johann Wolfgang Goethe-Universität, Frankfurt a.M. / **Keller F**, Universitätsklinikum Ulm, Ulm / **Ketteler M**, KfH Nierenzentrum Coburg, Coburg / **Kiziler F**, Augusta Krankenanstalt Bochum, Bochum / **Kleinecke R**, Gemeinschaftspraxis Dres. Ursula & Rudolf Kleinecke, Bamberg / **Klemm A**, KfH Nierenzentrum Jena, Jena / **Kohnle M**, Nephrologisches Zentrum Hilden im MediPlus, Hilden / **Kortus-Götze B**, Universitätsklinikum Gießen und Marburg GmbH, Marburg / **Kube M**, PHV-Dialysezentrum Hamburg-Nord, Hamburg / **Lange D**, Nieren- und Dialysezentrum Eichsfeld, Heilbad Heiligenstadt / **Lange-Hüsken F**, MVZ Dialyse Schlankreye, Hamburg / **Laube C**, Gemeinschaftspraxis für Nierenerkrankungen und Bluthochdruck - Dialyse, Bremen / **Laue O**, Zentrum für Nieren-, Hochdruck- und Stoffwechselerkrankungen – Langenhagen, Langenhagen / **Leingärtner T**, Praxis Dr. Tobias Leingärtner - Dr. Claudia Bodenmeier, Regensburg / **Lepenius J**, KfH Nierenzentrum Berlin Charlottenburg, Berlin / **Linke B**, Nephrologische Gemeinschaftspraxis Dr. med. Heil, Dr. med. Linke, Oldenburg in Holstein / **Loke O**, Nephrologische Gemeinschaftspraxis Dres. med. Mohler, Loke, Meinke, Lüdenscheid / **Loley G**, KfH Nierenzentrum Osnabrück, Osnabrück / **Lufft V**, Nephrologisches Zentrum Rendsburg - Eckernförde, Rendsburg / **Marx C**, Dialyse-Nordhausen, Nordhausen / **Meßtorff K**, Nieren- und Hochdruckzentrum Stade, Stade / **Meyer W**, Nierenpraxis und Dialyse Buxtehude-Stade, Buxtehude / **Oppermann M**, Nephrologische Gemeinschaftspraxis Perleberg, Perleberg / **Özcan F**, Klinikum Dortmund - Medizinische Klinik Mitte, Dortmund / **Pavenstädt H J**, Universitätsklinikum Münster, Münster / **Plöger A**, Gemeinschaftspraxis für Innere Medizin, Nieren- und Hochdruckerkrankungen in Bielefeld, Bielefeld / **Reichenberger F**, Carl-Thiem-Klinikum Cottbus gGmbH, Cottbus / **Reinking R**, Nephrologisches Zentrum Elmshorn, Elmshorn / **Roch P**, KfH Nierenzentrum beim Krankenhaus St. Josef, Regensburg / **Schaumann D**, Überörtliche nephrologische Gemeinschaftspraxis Dres. Schaumann,

Schüler, Thiele, Kranzhöfer, Ulbricht, Clajus GbR, Hameln / **Schilken P**, Nephrologische Gemeinschaftspraxis Paderborn, Paderborn / **Schlee H**, Nephrologische Gemeinschaftspraxis im Burgenlandkreis – Klinisches Zentrum Weißenfels, Weißenfels / **Schmiedel D**, Nephrologische Gemeinschaftspraxis, Bad Nenndorf / **Schneidenbach R**, Nephrocare Hamburg-Barmbek GmbH, Hamburg / **Schnierda J**, Facharztzentrum Aarberg, Waldshut-Tiengen / **Schnitzler A**, Dialyse – Lüneburg, Lüneburg / **Schulze M**, Dialyse - Bad Zwischenahn, Bad Zwischenahn / **Seuffert H M**, Nierenzentrum Dr. Seuffert Dr. Zosel Dr. Suchomski, Karlsruhe / **Seyfried J**, Nephrologisches Zentrum Pforzheim-Calw-Nagold, Pforzheim / **Siegmund J**, Dialysezentrum Hamburg-West, Hamburg / **Siwek-Orman E**, Nierenzentrum IIm-Kreis, Arnstadt / **Spieß M**, Internistische Schwerpunktpraxis Gastroenterologie - Nephrologie, Kaiserslautern / **Stahn A**, Praxis für Nieren- und Bluthochdruckkrankheiten - Dialysezentrum Altona, Hamburg / **Storckenmaier R**, PHV-Dialysezentrum Sindelfingen, Sindelfingen / **Teichler S**, Nephrologische Gemeinschaftspraxis im Burgenlandkreis – Klinisches Zentrum Naumburg, Naumburg / **Tillmann F P**, Dialysezentrum Emsdetten, Emsdetten / **Toussaint K**, Nephrocare Hamburg-Barmbek GmbH, Hamburg / **Tripps C**, PHV-Dialysezentrum Oschersleben-Neindorf, Oschersleben-Neindorf / **Weiner S**, Krankenhaus der Barmherzigen Brüder, Trier / **Wiedemann H**, Nephrologisches Zentrum Pforzheim-Calw-Nagold, Nahgold / **Wirtz G**, Dialysezentrum Kamen, Kamen / **Wollweber T**, Hausarztpraxis Dr. Wollweber, Wandersloh / **Wullstein H G**, PHV Dialysezentrum im Alstertal, Hamburg / **Zander A**, Nephrologisches Zentrum Walsrode, Verden.
